# Supplementary material for: Bacteriophage application to control the contaminated water with Shigella
Source: PubMed Central journal article supplement (PMC4789750; doi:10.1038/srep22636), 2016-03-14
Supplement: srep22636-s1.pdf [file srep22636-s1.pdf]

**Bacteriophage application to control the contaminated water with *Shigella***

**Jin Woo Jun, Sib Sankar Giri, Hyoun Joong Kim, Sae Kil Yun, Cheng Chi, Ji Young Chai,  
Byeong Chun Lee, Se Chang Park**

**Supplementary Information**

**Table S1. Predicted genes and gene products of pSs-1.**

| Gene    |               | Gene product |         |         |      | Amino acid Identity (%) | Putative function [organism] (E-value) {functional group <sup>a</sup> } | Predicted TMH and signal peptide |         |
|---------|---------------|--------------|---------|---------|------|-------------------------|-------------------------------------------------------------------------|----------------------------------|---------|
| ORF No. | Range         | Strand       | aa size | MW (kD) | pI   |                         |                                                                         | TMHMH                            | SignalP |
| 1       | 40 - 189      | -            | 50      | 4.9     | 9.50 | 98                      | hypothetical protein [Shigella phage Shfl2] (2e-21)                     | 1                                | Y       |
| 2       | 186 - 1514    | -            | 443     | 50.6    | 8.45 | 99                      | DNA topoisomerase [Shigella phage Shfl2] (0.0) {ii}                     | 0                                | N       |
| 3       | 1652 - 1810   | -            | 53      | 5.7     | 4.21 | 43                      | hypothetical protein [Shigella phage Shfl2] (0.021)                     | 1                                | Y       |
| 4       | 1821 - 1976   | -            | 52      | 5.6     | 7.82 | 75                      | hypothetical protein [Shigella phage Shfl2] (4e-17)                     | 2                                | Y       |
| 5       | 2064 - 2519   | -            | 152     | 17.0    | 9.90 | 99                      | nucleoid disruption protein [Shigella phage Shfl2] (3e-106) {v}         | 0                                | N       |
| 6       | 2579 - 2794   | -            | 72      | 8.2     | 4.20 | 99                      | hypothetical protein [Shigella phage Shfl2] (6e-43)                     | 0                                | N       |
| 7       | 2910 - 3107   | -            | 66      | 7.5     | 9.40 | 95                      | hypothetical protein [Shigella phage Shfl2] (1e-36)                     | 1                                | Y       |
| 8       | 3115 - 3228   | -            | 38      | 4.3     | 9.52 | 61                      | membrane protein [Shigella phage SP18] (4e-06) {i}                      | 1                                | N       |
| 9       | 3212 - 3325   | -            | 38      | 4.6     | 7.84 | 94                      | hypothetical protein [Shigella phage Shfl2] (6e-14)                     | 0                                | N       |
| 10      | 3472 - 3735   | -            | 88      | 10.3    | 4.87 | 98                      | hypothetical protein [Shigella phage Shfl2] (2e-55)                     | 0                                | N       |
| 11      | 3810 - 4286   | -            | 159     | 18.2    | 7.66 | 97                      | endonuclease [Shigella phage Shfl2] (5e-112) {ii}                       | 0                                | N       |
| 12      | 4300 - 4629   | -            | 110     | 12.7    | 4.61 | 86                      | hypothetical protein [Enterobacteria phage T4] (6e-06)                  | 0                                | N       |
| 13      | 4667 - 4861   | -            | 65      | 7.6     | 6.20 | 48                      | hypothetical protein [Shigella phage SP18] (8e-13)                      | 0                                | N       |
| 14      | 4890 - 5828   | -            | 313     | 35.6    | 5.68 | 99                      | protector from early lysis [Shigella phage Shfl2] (0.0) {v}             | 0                                | N       |
| 15      | 5840 - 8017   | -            | 726     | 82.8    | 5.84 | 97                      | hypothetical protein [Shigella phage Shfl2] (0.0)                       | 0                                | N       |
| 16      | 8028 - 8231   | -            | 68      | 8.2     | 6.58 | 78                      | hypothetical protein [Shigella phage SP18] (7e-24)                      | 0                                | N       |
| 17      | 8286 - 10103  | -            | 606     | 68.4    | 7.60 | 99                      | DNA dependent ATPase [Shigella phage Shfl2] (0.0) {ii}                  | 0                                | N       |
| 18      | 10173 - 10433 | -            | 87      | 9.4     | 7.71 | 99                      | hypothetical protein [Shigella phage Shfl2] (3e-55)                     | 0                                | Y       |
| 19      | 10438 - 10809 | -            | 124     | 14.3    | 4.94 | 96                      | hypothetical protein [Shigella phage Shfl2] (5e-78)                     | 0                                | N       |
| 20      | 10812 - 10988 | -            | 59      | 6.8     | 8.38 | 76                      | hypothetical protein [Shigella phage Shfl2] (6e-25)                     | 0                                | N       |
| 21      | 10991 - 11410 | -            | 140     | 16.6    | 4.76 | 99                      | RNA metabolism moderator [Shigella phage Shfl2] (1e-96) {iii}           | 0                                | N       |
| 22      | 11410 - 11625 | -            | 72      | 8.5     | 5.00 | 97                      | T4 tRNAs [Shigella phage Shfl2] (9e-43) {iii}                           | 0                                | N       |
| 23      | 11798 - 12286 | -            | 163     | 16.6    | 4.76 | 93                      | modifier of transcription [Shigella phage Shfl2] (2e-102) {iii}         | 0                                | N       |
| 24      | 12363 - 12905 | -            | 181     | 20.4    | 5.15 | 75                      | modifier of transcription [Shigella phage Shfl2] (1e-18) {iii}          | 0                                | N       |
| 25      | 12908 - 13408 | -            | 167     | 20.0    | 5.97 | 87                      | modifier of transcription [Shigella phage Shfl2] (2e-101) {iii}         | 0                                | N       |
| 26      | 13472 - 14155 | -            | 228     | 26.0    | 4.88 | 64                      | exonuclease [Shigella phage SP18] (4e-104) {ii}                         | 0                                | N       |
| 27      | 14155 - 14397 | -            | 81      | 9.3     | 5.36 | 98                      | hypothetical protein [Shigella phage Shfl2] (8e-48)                     | 0                                | N       |
| 28      | 14390 - 14635 | -            | 82      | 9.5     | 4.77 | 99                      | hypothetical protein [Shigella phage Shfl2] (5e-49)                     | 0                                | N       |
| 29      | 14622 - 14882 | -            | 87      | 9.9     | 7.85 | 94                      | hypothetical protein [Enterobacteria phage AR1] (2e-49)                 | 0                                | N       |
| 30      | 14889 - 16208 | -            | 440     | 50.0    | 7.61 | 99                      | DNA helicase [Shigella phage Shfl2] (0.0) {ii}                          | 0                                | N       |
| 31      | 16205 - 16516 | -            | 104     | 12.2    | 9.69 | 100                     | hypothetical protein [Shigella phage Shfl2] (1e-67)                     | 0                                | N       |

|    |               |   |     |       |       |     |                                                                          |   |   |
|----|---------------|---|-----|-------|-------|-----|--------------------------------------------------------------------------|---|---|
| 32 | 16518 - 17264 | - | 249 | 29.1  | 9.95  | 98  | anti-sigma factor [Shigella phage Shfl2] (3e-174) {iii}                  | 0 | N |
| 33 | 17381 - 17983 | - | 201 | 23.4  | 5.86  | 99  | RNA polymerase [Shigella phage Shfl2] (5e-145) {iii}                     | 0 | N |
| 34 | 17980 - 18603 | - | 208 | 24.3  | 5.46  | 97  | RNA polymerase [Shigella phage Shfl2] (5e-145) {iii}                     | 0 | N |
| 35 | 18671 - 18853 | - | 61  | 7.1   | 4.27  | 41  | hypothetical protein [Shigella phage SP18] (9e-07)                       | 0 | N |
| 36 | 18862 - 19332 | - | 157 | 18.3  | 6.53  | 97  | hypothetical protein [Shigella phage Shfl2] (9e-107)                     | 0 | N |
| 37 | 19325 - 19477 | - | 51  | 5.8   | 5.73  | 98  | hypothetical protein [Shigella phage Shfl2] (6e-26)                      | 0 | N |
| 38 | 19486 - 19671 | - | 62  | 7.5   | 4.88  | 98  | transcription modulator [Shigella phage Shfl2] (2e-34) {iii}             | 0 | N |
| 39 | 19664 - 20149 | - | 162 | 18.3  | 4.46  | 98  | transcription modulator [Shigella phage Shfl2] (9e-110) {iii}            | 0 | N |
| 40 | 20158 - 20496 | - | 113 | 12.6  | 3.85  | 47  | hypothetical protein [Shigella phage SP18] (5e-05)                       | 0 | N |
| 41 | 20496 - 20708 | - | 71  | 8.4   | 5.52  | 60  | hypothetical protein [Shigella phage Shfl2] (3e-22)                      | 0 | N |
| 42 | 20806 - 21042 | - | 79  | 8.6   | 5.45  | 49  | outer capsid protein [Shigella phage Shfl2] (2e-14) {i}                  | 0 | N |
| 43 | 21085 - 21603 | - | 173 | 20.2  | 4.62  | 72  | dCTPase [Shigella phage Shfl2] (2e-84) {iv}                              | 0 | N |
| 44 | 21675 - 21875 | + | 67  | 7.2   | 10.00 | 95  | hypothetical protein [Enterobacteria phage T4] (4e-36)                   | 2 | Y |
| 45 | 21872 - 22900 | - | 343 | 39.9  | 9.31  | 99  | DNA primase [Shigella phage Shfl2] (0.0) {ii}                            | 0 | N |
| 46 | 22903 - 23067 | - | 55  | 6.0   | 5.39  | 98  | hypothetical protein [Shigella phage Shfl2] (5e-28)                      | 0 | N |
| 47 | 23069 - 23425 | - | 119 | 13.9  | 4.83  | 99  | hypothetical protein [Shigella phage Shfl2] (8e-79)                      | 0 | N |
| 48 | 23438 - 23731 | - | 98  | 11.1  | 4.62  | 97  | spackle periplasmic protein [Shigella phage Shfl2] (5e-63) {v}           | 0 | Y |
| 49 | 23790 - 24047 | - | 86  | 10.2  | 9.88  | 95  | hypothetical protein [Shigella phage Shfl2] (2e-45)                      | 0 | N |
| 50 | 24049 - 24231 | - | 61  | 7.2   | 5.69  | 97  | discriminator of mRNA degradation [Enterobacteria phage T4] (6e-33) {ii} | 0 | N |
| 51 | 24290 - 25717 | - | 476 | 53.6  | 5.44  | 99  | DNA primase/helicase [Shigella phage Shfl2] (0.0) {ii}                   | 0 | N |
| 52 | 25727 - 26071 | - | 115 | 13.4  | 4.89  | 46  | head vertex assembly protein [Shigella phage SP18] (5e-19) {i}           | 0 | N |
| 53 | 26064 - 27245 | - | 394 | 44.2  | 5.35  | 100 | recombination protein [Shigella phage Shfl2] (0.0) {ii}                  | 0 | N |
| 54 | 27323 - 28165 | - | 281 | 32.5  | 7.08  | 99  | hypothetical protein [Shigella phage Shfl2] (0.0)                        | 0 | N |
| 55 | 28162 - 28902 | - | 247 | 28.6  | 5.43  | 96  | dCMP hydroxymethylase [Shigella phage Shfl2] (3e-176) {iv}               | 0 | N |
| 56 | 28910 - 29059 | - | 50  | 5.6   | 8.98  | 48  | hypothetical protein [Shigella phage SP18] (1e-06)                       | 1 | Y |
| 57 | 29056 - 29307 | - | 84  | 9.5   | 9.40  | 100 | membrane protein [Shigella phage Shfl2] (4e-49) {i}                      | 2 | Y |
| 58 | 29315 - 29695 | - | 127 | 14.3  | 7.55  | 98  | membrane protein [Enterobacteria phage T4] (9e-85) {i}                   | 0 | Y |
| 59 | 29876 - 32572 | - | 899 | 103.6 | 5.96  | 99  | DNA polymerase [Shigella phage Shfl2] (0.0) {ii}                         | 0 | N |
| 60 | 32651 - 33019 | - | 123 | 14.7  | 8.97  | 99  | translational repressor protein [Enterobacteria phage T4] (6e-84) {ii}   | 0 | N |
| 61 | 33021 - 33584 | - | 188 | 21.5  | 7.66  | 54  | DNA polymerase [Shigella phage SP18] (1e-63) {ii}                        | 0 | N |
| 62 | 33586 - 34545 | - | 320 | 35.9  | 6.72  | 71  | DNA polymerase [Shigella phage SP18] (2e-167) {ii}                       | 0 | N |
| 63 | 34595 - 35281 | - | 229 | 25.0  | 4.89  | 61  | DNA polymerase [Shigella phage SP18] (3e-95) {ii}                        | 0 | N |
| 64 | 35337 - 35726 | - | 130 | 14.8  | 6.83  | 99  | RNA polymerase [Shigella phage Shfl2] (9e-90) {iii}                      | 0 | N |
| 65 | 35736 - 35924 | - | 63  | 7.5   | 5.55  | 97  | hypothetical protein [Shigella phage Shfl2] (2e-36)                      | 0 | N |
| 66 | 35980 - 37662 | - | 561 | 63.8  | 8.49  | 96  | endonuclease [Shigella phage Shfl2] (0.0) {ii}                           | 0 | N |
| 67 | 37659 - 37865 | - | 69  | 8.2   | 4.24  | 99  | hypothetical protein [Enterobacteria phage T4] (2e-40)                   | 0 | N |
| 68 | 37846 - 38109 | - | 88  | 10.3  | 4.21  | 99  | hypothetical protein [Shigella phage Shfl2] (3e-55)                      | 0 | N |

|     |               |   |     |      |       |     |                                                               |   |   |
|-----|---------------|---|-----|------|-------|-----|---------------------------------------------------------------|---|---|
| 69  | 38106 - 39125 | - | 340 | 39.2 | 4.90  | 99  | endonuclease [Shigella phage Shfl2] (0.0) {ii}                | 0 | N |
| 70  | 39302 - 40504 | - | 401 | 46.9 | 6.05  | 99  | alpha-glucosyl-transferase [Shigella phage Shfl2] (0.0) {iv}  | 0 | N |
| 71  | 40571 - 40744 | - | 58  | 6.7  | 9.56  | 89  | hypothetical protein [Shigella phage Shfl2] (4e-29)           | 0 | N |
| 72  | 40748 - 40951 | - | 68  | 8.0  | 9.42  | 43  | hypothetical protein [Shigella phage SP18] (2e-08)            | 0 | N |
| 73  | 40920 - 41237 | - | 106 | 12.5 | 8.78  | 42  | hypothetical protein [Shigella phage SP18] (3e-17)            | 0 | N |
| 74  | 41239 - 41382 | - | 48  | 5.8  | 4.14  | 100 | hypothetical protein [Shigella phage Shfl2] (7e-25)           | 0 | N |
| 75  | 41441 - 41998 | - | 186 | 21.6 | 5.44  | 79  | sigma factor [Shigella phage SP18] (5e-101) {iii}             | 0 | N |
| 76  | 42077 - 42346 | - | 90  | 10.8 | 5.64  | 52  | hypothetical protein [Shigella phage SP18] (6e-26)            | 0 | N |
| 77  | 42343 - 42558 | - | 72  | 8.2  | 3.69  | 58  | hypothetical protein [Shigella phage SP18] (2e-17)            | 0 | N |
| 78  | 42561 - 42887 | - | 109 | 12.8 | 9.70  | 98  | hypothetical protein [Shigella phage Shfl2] (2e-70)           | 0 | N |
| 79  | 42940 - 43140 | - | 67  | 7.8  | 7.89  | 94  | hypothetical protein [Shigella phage Shfl2] (5e-39)           | 0 | N |
| 80  | 43141 - 43272 | - | 44  | 5.2  | 9.60  | 93  | hypothetical protein [Shigella phage SP18] (2e-20)            | 0 | N |
| 81  | 43280 - 43573 | - | 98  | 11.9 | 9.79  | 74  | hypothetical protein [Shigella phage SP18] (1e-45)            | 0 | N |
| 82  | 43566 - 43748 | - | 61  | 7.1  | 9.37  | 66  | hypothetical protein [Shigella phage Shfl2] (3e-18)           | 1 | N |
| 83  | 43773 - 43880 | + | 36  | 4.2  | 9.99  | 96  | hypothetical protein [Enterobacteria phage RB14] (5e-09)      | 0 | N |
| 84  | 43906 - 44214 | - | 103 | 11.8 | 9.14  | 68  | glutaredoxin [Shigella phage SP18] (4e-42) {iv}               | 0 | N |
| 85  | 44217 - 44429 | - | 71  | 8.0  | 9.22  | 38  | membrane protein [Shigella phage SP18] (2e-07) {i}            | 1 | N |
| 86  | 44439 - 44552 | - | 38  | 4.5  | 4.54  | 92  | hypothetical protein [Shigella phage SP18] (5e-16)            | 0 | N |
| 87  | 44545 - 45015 | - | 157 | 18.2 | 5.90  | 98  | ribonucleotide reductase [Shigella phage Shfl2] (6e-110) {iv} | 0 | N |
| 88  | 45012 - 46829 | - | 606 | 68.1 | 6.59  | 99  | ribonucleotide reductase [Shigella phage Shfl2] (0.0) {iv}    | 0 | N |
| 89  | 46826 - 47299 | - | 158 | 18.2 | 8.96  | 83  | endonuclease [Shigella phage SP18] (3e-90) {ii}               | 0 | N |
| 90  | 47342 - 47518 | - | 59  | 7.0  | 10.15 | 78  | hypothetical protein [Shigella phage SP18] (3e-25)            | 0 | N |
| 91  | 47518 - 47964 | - | 149 | 17.0 | 4.37  | 92  | host protease inhibitor [Shigella phage Shfl2] (9e-93) {v}    | 0 | N |
| 92  | 47948 - 48103 | - | 52  | 6.2  | 3.94  | 73  | hypothetical protein [Shigella phage SP18] (2e-14)            | 0 | N |
| 93  | 48088 - 48408 | - | 107 | 12.6 | 4.48  | 74  | hypothetical protein [Shigella phage SP18] (3e-52)            | 0 | N |
| 94  | 48419 - 48589 | - | 57  | 6.7  | 4.15  | 93  | hypothetical protein [Shigella phage Shfl2] (9e-28)           | 0 | N |
| 95  | 48592 - 48804 | - | 71  | 8.0  | 7.79  | 100 | hypothetical protein [Enterobacteria phage RB51] (4e-42)      | 0 | N |
| 96  | 48804 - 49067 | - | 88  | 10.1 | 6.71  | 87  | thioredoxin [Shigella phage SP18] (2e-51) {iv}                | 0 | N |
| 97  | 49069 - 49311 | - | 81  | 9.5  | 7.91  | 79  | hypothetical protein [Shigella phage SP18] (6e-36)            | 0 | N |
| 98  | 49298 - 49615 | - | 106 | 12.2 | 6.51  | 92  | hypothetical protein [Shigella phage Shfl2] (6e-67)           | 0 | N |
| 99  | 49612 - 50541 | - | 310 | 36.0 | 9.45  | 97  | hypothetical protein [Shigella phage Shfl2] (0.0)             | 0 | N |
| 100 | 50594 - 51595 | - | 334 | 39.1 | 5.91  | 92  | hypothetical protein [Shigella phage Shfl2] (0.0)             | 0 | N |
| 101 | 51653 - 52675 | - | 341 | 39.6 | 9.12  | 92  | hypothetical protein [Shigella phage Shfl2] (0.0)             | 0 | N |
| 102 | 52684 - 53574 | - | 297 | 34.1 | 9.17  | 97  | hypothetical protein [Shigella phage Shfl2] (0.0)             | 0 | N |
| 103 | 53582 - 53983 | - | 134 | 15.4 | 6.54  | 92  | hypothetical protein [Shigella phage Shfl2] (3e-62)           | 2 | Y |
| 104 | 54039 - 54566 | - | 176 | 20.8 | 6.65  | 68  | hypothetical protein [Shigella phage SP18] (6e-82)            | 0 | N |
| 105 | 54627 - 54929 | - | 101 | 12.1 | 9.68  | 99  | hypothetical protein [Shigella phage Shfl2] (9e-67)           | 0 | N |

|     |               |   |     |      |       |     |                                                              |   |   |
|-----|---------------|---|-----|------|-------|-----|--------------------------------------------------------------|---|---|
| 106 | 55031 - 55999 | - | 323 | 36.5 | 5.01  | 99  | hypothetical protein [Shigella phage Shfl2] (0.0)            | 0 | N |
| 107 | 56114 - 56359 | - | 82  | 9.6  | 4.69  | 98  | hypothetical protein [Shigella phage Shfl2] (2e-48)          | 0 | N |
| 108 | 56389 - 57123 | - | 245 | 28.4 | 9.13  | 95  | hypothetical protein [Shigella phage Shfl2] (3e-166)         | 0 | N |
| 109 | 57123 - 57584 | - | 154 | 18.0 | 9.33  | 91  | hypothetical protein [Shigella phage Shfl2] (6e-79)          | 2 | N |
| 110 | 57593 - 58114 | - | 174 | 19.3 | 4.89  | 96  | hypothetical protein [Shigella phage Shfl2] (5e-117)         | 0 | N |
| 111 | 58121 - 58654 | - | 178 | 20.8 | 5.20  | 84  | hypothetical protein [Shigella phage Shfl2] (3e-106)         | 0 | N |
| 112 | 58656 - 58922 | - | 89  | 10.3 | 6.71  | 95  | hypothetical protein [Enterobacteria phage RB14] (4e-55)     | 0 | N |
| 113 | 58983 - 59087 | - | 35  | 4.3  | 8.14  | 91  | hypothetical protein [Enterobacteria phage T4] (4e-12)       | 1 | N |
| 114 | 59148 - 59321 | - | 58  | 6.8  | 5.27  | 100 | hypothetical protein [Shigella phage Shfl2] (2e-32)          | 0 | N |
| 115 | 59311 - 59505 | - | 65  | 7.7  | 5.04  | 63  | hypothetical protein [Shigella phage Shfl2] (1e-14)          | 0 | N |
| 116 | 59508 - 59711 | - | 68  | 7.7  | 4.59  | 93  | hypothetical protein [Shigella phage Shfl2] (2e-34)          | 0 | N |
| 117 | 59711 - 59899 | - | 63  | 7.2  | 4.11  | 51  | hypothetical protein [Shigella phage SP18] (7e-09)           | 0 | N |
| 118 | 59995 - 60381 | - | 129 | 14.7 | 5.53  | 56  | hypothetical protein [Shigella phage SP18] (2e-45)           | 0 | N |
| 119 | 60378 - 60671 | - | 98  | 11.2 | 4.90  | 98  | lysis inhibition protein [Shigella phage Shfl2] (8e-64) {v}  | 0 | Y |
| 120 | 60684 - 60896 | - | 71  | 8.4  | 10.19 | 100 | hypothetical protein [Enterobacteria phage T4] (4e-42)       | 0 | N |
| 121 | 60939 - 61520 | - | 194 | 21.7 | 6.22  | 71  | thymidine kinase [Shigella phage SP18] (2e-95) {iv}          | 0 | N |
| 122 | 61522 - 61710 | - | 63  | 7.3  | 4.12  | 100 | hypothetical protein [Enterobacteria phage T4] (8e-34)       | 0 | N |
| 123 | 61707 - 61838 | - | 44  | 5.2  | 3.91  | 42  | hypothetical protein [Shigella phage SP18] (0.003)           | 0 | N |
| 124 | 61889 - 62065 | - | 59  | 6.6  | 6.53  | 59  | hypothetical protein [Shigella phage Shfl2] (5e-11)          | 0 | N |
| 125 | 62062 - 62274 | - | 71  | 8.2  | 5.51  | 71  | hypothetical protein [Shigella phage SP18] (6e-28)           | 0 | N |
| 126 | 62265 - 62477 | - | 71  | 8.6  | 8.83  | 99  | hypothetical protein [Shigella phage Shfl2] (7e-44)          | 0 | N |
| 127 | 62449 - 62928 | - | 160 | 17.6 | 5.03  | 97  | hypothetical protein [Shigella phage Shfl2] (3e-110)         | 0 | N |
| 128 | 62925 - 63272 | - | 116 | 13.1 | 8.95  | 99  | tRNA synthetase modifier [Shigella phage Shfl2] (4e-76) {iv} | 0 | Y |
| 129 | 63265 - 63810 | - | 182 | 20.8 | 9.76  | 68  | hypothetical protein [Shigella phage SP18] (1e-76)           | 0 | Y |
| 130 | 63818 - 64279 | - | 154 | 18.0 | 8.93  | 60  | endonuclease [Shigella phage SP18] (2e-52) {ii}              | 0 | N |
| 131 | 64339 - 64617 | - | 93  | 11.0 | 5.45  | 99  | hypothetical protein [Shigella phage Shfl2] (1e-58)          | 0 | N |
| 132 | 64617 - 64883 | - | 89  | 10.3 | 4.66  | 64  | hypothetical protein [Shigella phage SP18] (5e-28)           | 0 | N |
| 133 | 64876 - 65097 | - | 74  | 8.3  | 4.07  | 95  | hypothetical protein [Shigella phage Shfl2] (1e-42)          | 0 | N |
| 134 | 65097 - 65459 | - | 121 | 13.9 | 5.94  | 96  | hypothetical protein [Shigella phage Shfl2] (5e-78)          | 0 | N |
| 135 | 65466 - 65795 | - | 110 | 12.9 | 8.89  | 96  | hypothetical protein [Shigella phage Shfl2] (2e-71)          | 0 | N |
| 136 | 65792 - 66331 | - | 180 | 20.4 | 8.72  | 94  | hypothetical protein [Shigella phage Shfl2] (2e-112)         | 0 | N |
| 137 | 66485 - 66958 | - | 158 | 17.8 | 8.91  | 99  | hypothetical protein [Enterobacteria phage RB51] (6e-109)    | 0 | N |
| 138 | 66968 - 67384 | - | 139 | 16.4 | 9.28  | 72  | endonuclease [Shigella phage SP18] (1e-68) {ii}              | 0 | N |
| 139 | 67444 - 67938 | - | 165 | 18.7 | 9.59  | 98  | lysozyme [Shigella phage Shfl2] (6e-114) {v}                 | 0 | N |
| 140 | 67975 - 68415 | - | 147 | 17.0 | 5.05  | 96  | hydrolase [Shigella phage Shfl2] (9e-101) {v}                | 0 | N |
| 141 | 68412 - 68900 | - | 163 | 19.2 | 9.06  | 90  | hypothetical protein [Shigella phage Shfl2] (1e-101)         | 2 | N |
| 142 | 68897 - 69271 | - | 125 | 14.7 | 8.81  | 86  | hypothetical protein [Shigella phage Shfl2] (3e-61)          | 2 | Y |

|     |                |   |      |       |       |     |                                                                                   |   |   |
|-----|----------------|---|------|-------|-------|-----|-----------------------------------------------------------------------------------|---|---|
| 143 | 69253 - 69645  | - | 131  | 15.1  | 9.67  | 85  | hypothetical protein [Shigella phage Shfl2] (1e-64)                               | 2 | N |
| 144 | 69614 - 70228  | - | 205  | 24.2  | 5.37  | 96  | hypothetical protein [Shigella phage Shfl2] (5e-139)                              | 0 | N |
| 145 | 70270 - 70863  | - | 198  | 22.2  | 6.06  | 99  | hypothetical protein [Shigella phage Shfl2] (3e-133)                              | 0 | N |
| 146 | 70906 - 71436  | - | 177  | 19.8  | 6.90  | 92  | hypothetical protein [Enterobacteria phage RB32] (1e-111)                         | 0 | N |
| 147 | 71493 - 71756  | - | 88   | 10.2  | 4.46  | 99  | hypothetical protein [Enterobacteria phage T4] (2e-56)                            | 0 | N |
| 148 | 71997 - 72560  | - | 188  | 20.9  | 9.43  | 97  | hypothetical protein [Shigella phage Shfl2] (5e-124)                              | 0 | N |
| 149 | 72686 - 73159  | - | 158  | 17.3  | 9.46  | 99  | hypothetical protein [Enterobacteria phage AR1] (9e-107)                          | 0 | N |
| 150 | 74479 - 74766  | - | 96   | 11.3  | 4.91  | 96  | hypothetical protein [Shigella phage Shfl2] (2e-59)                               | 0 | N |
| 151 | 74769 - 75179  | - | 137  | 16.2  | 4.85  | 98  | hypothetical protein [Shigella phage Shfl2] (2e-93)                               | 0 | N |
| 152 | 75181 - 75366  | - | 62   | 6.7   | 7.80  | 95  | hypothetical protein [Shigella phage Shfl2] (2e-31)                               | 2 | Y |
| 153 | 75437 - 75694  | - | 86   | 9.4   | 9.34  | 96  | hypothetical protein [Enterobacteria phage RB51] (2e-50)                          | 0 | N |
| 154 | 75767 - 76222  | - | 152  | 17.2  | 5.14  | 99  | hypothetical protein [Shigella phage Shfl2] (8e-106)                              | 0 | N |
| 155 | 76222 - 76464  | - | 81   | 8.8   | 4.26  | 96  | tail fiber assembly protein [Shigella phage Shfl2] (1e-42) {i}                    | 0 | N |
| 156 | 76464 - 77195  | - | 244  | 27.7  | 5.06  | 96  | deoxynucleotide monophosphate kinase [Shigella phage Shfl2] (2e-169) {iv}         | 0 | N |
| 157 | 77245 - 77775  | - | 177  | 19.8  | 4.39  | 99  | tail completion and sheath stabilizer protein [Shigella phage Shfl2] (1e-124) {i} | 0 | N |
| 158 | 77882 - 78706  | - | 275  | 31.7  | 10.12 | 99  | DNA end protector protein [Shigella phage Shfl2] (0.0) {ii}                       | 0 | N |
| 159 | 78706 - 79158  | - | 151  | 17.7  | 9.75  | 66  | head completion protein [Shigella phage SP18] (7e-69) {i}                         | 0 | N |
| 160 | 79206 - 79796  | + | 197  | 23.0  | 5.92  | 99  | baseplate wedge [Shigella phage Shfl2] (3e-140) {i}                               | 0 | N |
| 161 | 79780 - 81507  | + | 576  | 63.2  | 5.28  | 99  | baseplate hub protein [Shigella phage Shfl2] (0.0) {i}                            | 0 | N |
| 162 | 81500 - 82036  | + | 179  | 20.2  | 4.46  | 97  | hypothetical protein [Shigella phage Shfl2] (2e-121)                              | 0 | N |
| 163 | 82037 - 82330  | + | 98   | 10.3  | 8.60  | 100 | hypothetical protein [Enterobacteria phage T4] (1e-63)                            | 0 | N |
| 164 | 82339 - 84321  | + | 661  | 74.4  | 4.62  | 99  | baseplate wedge [Shigella phage Shfl2] (0.0) {i}                                  | 0 | N |
| 165 | 84318 - 87416  | + | 1033 | 119.2 | 5.11  | 99  | baseplate wedge [Shigella phage Shfl2] (0.0) {i}                                  | 1 | N |
| 166 | 87409 - 88413  | + | 335  | 38.1  | 4.61  | 97  | baseplate wedge [Shigella phage Shfl2] (0.0) {i}                                  | 0 | N |
| 167 | 88477 - 89343  | + | 289  | 31.0  | 5.09  | 99  | baseplate wedge [Shigella phage Shfl2] (0.0) {i}                                  | 0 | N |
| 168 | 89343 - 91148  | + | 602  | 66.4  | 4.50  | 85  | baseplate wedge [Shigella phage Shfl2] (0.0) {i}                                  | 0 | N |
| 169 | 91148 - 91807  | + | 220  | 24.1  | 5.18  | 68  | baseplate wedge [Shigella phage Shfl2] (4e-104) {i}                               | 0 | N |
| 170 | 91804 - 93354  | + | 517  | 55.5  | 5.85  | 65  | tail fiber protein [Shigella phage Shfl2] (0.0) {i}                               | 0 | N |
| 171 | 93364 - 94821  | + | 486  | 52.5  | 4.77  | 82  | neck whisker protein [Shigella phage Shfl2] (0.0) {i}                             | 0 | N |
| 172 | 94854 - 95783  | + | 310  | 34.7  | 4.93  | 99  | neck protein [Shigella phage Shfl2] (0.0) {i}                                     | 0 | N |
| 173 | 95785 - 96555  | + | 257  | 29.6  | 4.57  | 99  | head completion protein [Shigella phage Shfl2] (0.0) {i}                          | 0 | N |
| 174 | 96597 - 97415  | + | 273  | 31.6  | 4.95  | 55  | tail completion and sheath stabilizer protein [Shigella phage SP18] (9e-95) {i}   | 0 | N |
| 175 | 97424 - 97918  | + | 165  | 18.5  | 4.55  | 99  | terminase [Shigella phage Shfl2] (2e-115) {ii}                                    | 0 | N |
| 176 | 97902 - 99734  | + | 611  | 69.8  | 5.53  | 100 | terminase [Shigella phage Shfl2] (0.0) {ii}                                       | 0 | N |
| 177 | 99766 - 101745 | + | 660  | 71.4  | 4.83  | 99  | tail sheath protein [Shigella phage Shfl2] (0.0) {i}                              | 0 | N |
| 178 | 101785-102402  | + | 206  | 23.9  | 9.53  | 51  | hypothetical protein [Enterobacteria phage T6] (3e-52)                            | 0 | N |
| 179 | 102510-103001  | + | 164  | 18.5  | 4.67  | 100 | tail tube protein [Shigella phage Shfl2] (3e-116) {i}                             | 0 | N |

|     |               |   |     |      |       |     |                                                                  |   |   |
|-----|---------------|---|-----|------|-------|-----|------------------------------------------------------------------|---|---|
| 180 | 103085-104659 | + | 525 | 61.1 | 5.36  | 99  | head vertex protein [Shigella phage Shfl2] (0.0) {i}             | 0 | N |
| 181 | 104659-104916 | + | 86  | 9.8  | 3.81  | 96  | prohead core protein [Shigella phage Shfl2] (1e-21) {i}          | 0 | N |
| 182 | 104916-105341 | + | 142 | 16.0 | 9.98  | 67  | prohead core protein [Shigella phage SP18] (1e-48) {i}           | 0 | N |
| 183 | 105341-105979 | + | 213 | 23.3 | 4.98  | 88  | prohead core scaffold protein [Shigella phage SP18] (3e-131) {i} | 0 | N |
| 184 | 106010-106819 | + | 270 | 29.9 | 4.58  | 99  | prohead core scaffold protein [Shigella phage Shfl2] (0.0) {i}   | 0 | N |
| 185 | 106838-108403 | + | 522 | 56.2 | 5.34  | 99  | major head protein [Shigella phage Shfl2] (0.0) {i}              | 0 | N |
| 186 | 108487-109770 | + | 428 | 47.1 | 4.70  | 99  | head vertex protein [Shigella phage Shfl2] (0.0) {i}             | 0 | N |
| 187 | 109800-110804 | - | 335 | 37.7 | 5.65  | 98  | RNA ligase [Shigella phage Shfl2] (0.0) {ii}                     | 0 | N |
| 188 | 110814-110915 | - | 34  | 4.0  | 4.29  | 97  | hypothetical protein [Enterobacteria phage T4] (2e-14)           | 0 | N |
| 189 | 111078-111263 | - | 62  | 7.2  | 10.35 | 59  | hypothetical protein [Shigella phage SP18] (1e-04)               | 0 | N |
| 190 | 111383-112801 | - | 473 | 50.9 | 4.44  | 78  | head outer capsid protein [Shigella phage Shfl2] (0.0) {i}       | 0 | N |
| 191 | 112811-113491 | - | 227 | 25.6 | 4.42  | 98  | prohead protein [Shigella phage Shfl2] (6e-159) {i}              | 0 | N |
| 192 | 113542-115053 | + | 504 | 58.0 | 9.29  | 99  | DNA helicase [Shigella phage Shfl2] (0.0) {ii}                   | 0 | N |
| 193 | 115079-115309 | + | 77  | 8.9  | 4.24  | 75  | hypothetical protein [Shigella phage SP18] (8e-23)               | 0 | N |
| 194 | 115365-115532 | - | 56  | 6.1  | 4.44  | 82  | hypothetical protein [Shigella phage SP18] (4e-26)               | 0 | N |
| 195 | 115561-115785 | - | 75  | 9.1  | 4.85  | 95  | hypothetical protein [Shigella phage Shfl2] (1e-44)              | 0 | N |
| 196 | 115785-116198 | - | 138 | 15.9 | 7.76  | 99  | ssDNA binding protein [Shigella phage Shfl2] (7e-92) {iii}       | 0 | N |
| 197 | 116265-116663 | - | 133 | 15.2 | 4.57  | 100 | baseplate wedge protein [Shigella phage Shfl2] (2e-89) {i}       | 0 | N |
| 198 | 116663-117289 | - | 209 | 24.0 | 5.57  | 99  | baseplate protein [Shigella phage Shfl2] (4e-148) {i}            | 0 | N |
| 199 | 117340-118089 | + | 250 | 29.4 | 5.82  | 98  | baseplate hub protein [Shigella phage Shfl2] (1e-178) {i}        | 0 | N |
| 200 | 118089-119264 | + | 392 | 44.5 | 5.21  | 99  | baseplate hub protein [Shigella phage Shfl2] (0.0) {i}           | 0 | N |
| 201 | 119284-119742 | + | 153 | 17.3 | 5.01  | 99  | baseplate hub protein [Shigella phage Shfl2] (5e-105) {i}        | 0 | N |
| 202 | 119739-121511 | + | 591 | 64.5 | 5.07  | 96  | baseplate hub protein [Shigella phage Shfl2] (0.0) {i}           | 1 | N |
| 203 | 121520-122614 | + | 365 | 39.8 | 8.40  | 95  | baseplate tail protein [Shigella phage Shfl2] (0.0) {i}          | 0 | N |
| 204 | 122614-123579 | + | 322 | 35.0 | 5.08  | 99  | baseplate tail protein [Shigella phage Shfl2] (0.0) {i}          | 0 | N |
| 205 | 123608-123898 | - | 97  | 10.8 | 4.67  | 59  | hypothetical protein [Shigella phage SP18] (1e-29)               | 0 | N |
| 206 | 123959-126016 | - | 686 | 76.0 | 6.05  | 99  | hypothetical protein [Shigella phage Shfl2] (0.0)                | 0 | N |
| 207 | 126020-128074 | - | 685 | 76.1 | 5.73  | 72  | RNA polymerase [Shigella phage Shfl2] (0.0) {iii}                | 0 | N |
| 208 | 128127-128315 | - | 63  | 7.2  | 4.50  | 90  | hypothetical protein [Shigella phage Shfl2] (3e-34)              | 0 | N |
| 209 | 128312-129772 | - | 487 | 55.2 | 5.85  | 98  | DNA ligase [Shigella phage Shfl2] (0.0) {ii}                     | 0 | N |
| 210 | 129769-130038 | - | 90  | 10.9 | 7.82  | 98  | hypothetical protein [Shigella phage Shfl2] (2e-58)              | 0 | N |
| 211 | 130038-130874 | - | 279 | 32.5 | 5.84  | 90  | hypothetical protein [Shigella phage Shfl2] (0.0)                | 0 | N |
| 212 | 130871-131329 | - | 153 | 17.2 | 9.20  | 97  | hypothetical protein [Shigella phage Shfl2] (2e-83)              | 0 | N |
| 213 | 131322-131537 | - | 72  | 8.3  | 4.94  | 49  | hypothetical protein [Shigella phage Shfl2] (2e-14)              | 0 | N |
| 214 | 131542-131829 | - | 96  | 10.8 | 7.80  | 97  | hypothetical protein [Shigella phage Shfl2] (1e-61)              | 0 | N |
| 215 | 131870-132235 | - | 122 | 14.2 | 6.05  | 100 | hypothetical protein [Shigella phage Shfl2] (3e-85)              | 0 | N |
| 216 | 132303-132635 | - | 111 | 13.0 | 6.11  | 97  | hypothetical protein [Shigella phage Shfl2] (2e-71)              | 0 | N |

|     |               |   |      |       |       |     |                                                                       |   |   |
|-----|---------------|---|------|-------|-------|-----|-----------------------------------------------------------------------|---|---|
| 217 | 133318-133566 | - | 83   | 9.4   | 8.06  | 89  | lysis inhibition protein [Shigella phage SP18] (4e-42) {v}            | 0 | N |
| 218 | 133714-134049 | - | 112  | 12.2  | 5.30  | 80  | head assembly protein [Shigella phage SP18] (3e-55) {i}               | 0 | N |
| 219 | 134106-134414 | - | 103  | 11.5  | 9.35  | 99  | hypothetical protein [Shigella phage Shfl2] (1e-65)                   | 0 | N |
| 220 | 134415-134651 | - | 79   | 9.5   | 9.71  | 95  | hypothetical protein [Shigella phage Shfl2] (2e-46)                   | 0 | N |
| 221 | 134651-135232 | - | 194  | 21.3  | 8.04  | 99  | dCMP deaminase [Shigella phage Shfl2] (2e-139) {iv}                   | 0 | N |
| 222 | 135229-135567 | - | 113  | 12.9  | 7.87  | 100 | hypothetical protein [Shigella phage Shfl2] (5e-75)                   | 0 | N |
| 223 | 135564-135800 | - | 79   | 8.8   | 5.75  | 99  | hypothetical protein [Shigella phage Shfl2] (2e-46)                   | 0 | N |
| 224 | 135794-136324 | - | 177  | 20.5  | 4.99  | 94  | hypothetical protein [Shigella phage Shfl2] (6e-103)                  | 0 | N |
| 225 | 136387-136662 | - | 92   | 10.2  | 4.87  | 99  | hypothetical protein [Shigella phage Shfl2] (8e-58)                   | 0 | N |
| 226 | 136665-136796 | - | 44   | 4.9   | 3.35  | 81  | hypothetical protein [Shigella phage Shfl2] (6e-15)                   | 0 | N |
| 227 | 136860-137057 | - | 66   | 7.7   | 6.71  | 95  | hypothetical protein [Enterobacteria phage T4] (6e-38)                | 0 | N |
| 228 | 137057-137965 | - | 303  | 34.9  | 8.64  | 94  | polynucleotide kinase/phosphatase [Shigella phage Shfl2] (0.0) {iv}   | 0 | Y |
| 229 | 137962-138282 | - | 107  | 12.2  | 8.55  | 98  | hypothetical protein [Shigella phage Shfl2] (2e-69)                   | 0 | N |
| 230 | 138286-138510 | - | 75   | 8.8   | 6.82  | 100 | hypothetical protein [Shigella phage Shfl2] (6e-47)                   | 0 | N |
| 231 | 138507-138806 | - | 100  | 11.7  | 8.76  | 65  | hypothetical protein [Shigella phage SP18] (8e-37)                    | 0 | N |
| 232 | 138803-139156 | - | 118  | 13.2  | 8.89  | 99  | hypothetical protein [Shigella phage Shfl2] (8e-75)                   | 1 | N |
| 233 | 139147-139653 | - | 169  | 19.2  | 6.42  | 100 | inhibitor of host transcription [Shigella phage Shfl2] (6e-120) {iii} | 0 | N |
| 234 | 139715-140839 | - | 375  | 43.6  | 5.02  | 99  | RNA ligase [Shigella phage Shfl2] (0.0) {ii}                          | 0 | N |
| 235 | 140892-141302 | - | 137  | 15.9  | 9.21  | 74  | endonuclease [Shigella phage SP18] (2e-67) {ii}                       | 0 | N |
| 236 | 141330-142508 | - | 393  | 46.1  | 4.93  | 92  | ribonucleotide reductase [Shigella phage Shfl2] (0.0) {iv}            | 0 | N |
| 237 | 142560-144824 | - | 755  | 86.1  | 5.87  | 99  | ribonucleotide reductase [Shigella phage Shfl2] (0.0) {iv}            | 0 | N |
| 238 | 144815-145102 | - | 96   | 11.0  | 8.98  | 99  | hypothetical protein [Shigella phage Shfl2] (3e-63)                   | 0 | N |
| 239 | 145095-145358 | - | 88   | 10.1  | 5.73  | 99  | hypothetical protein [Shigella phage Shfl2] (3e-55)                   | 0 | N |
| 240 | 145382-146242 | - | 287  | 33.2  | 6.07  | 81  | dTMP synthase [Shigella phage Shfl2] (3e-177) {iv}                    | 0 | N |
| 241 | 146242-146448 | - | 69   | 8.0   | 10.26 | 98  | hypothetical protein [Enterobacteria phage vB_EcoM_ACG-C40] (9e-21)   | 0 | N |
| 242 | 146445-147029 | - | 195  | 21.8  | 6.09  | 96  | dihydrofolate reductase [Shigella phage Shfl2] (3e-136) {iv}          | 0 | N |
| 243 | 147029-147274 | - | 82   | 9.8   | 4.05  | 99  | hypothetical protein [Shigella phage Shfl2] (6e-50)                   | 0 | N |
| 244 | 147285-147527 | - | 81   | 9.6   | 4.93  | 94  | hypothetical protein [Shigella phage Shfl2] (4e-47)                   | 0 | N |
| 245 | 147582-147962 | - | 127  | 15.0  | 5.62  | 92  | hypothetical protein [Shigella phage Shfl2] (2e-78)                   | 0 | N |
| 246 | 148008-148235 | - | 76   | 8.9   | 3.88  | 100 | hypothetical protein [Enterobacteria phage T4] (3e-46)                | 0 | N |
| 247 | 148381-149289 | - | 303  | 33.6  | 4.82  | 99  | ssDNA binding protein [Shigella phage Shfl2] (0.0) {iii}              | 0 | N |
| 248 | 149389-150042 | - | 218  | 26.1  | 9.37  | 75  | DNA helicase [Shigella phage SP18] (1e-116) {ii}                      | 0 | N |
| 249 | 150039-150377 | - | 113  | 12.9  | 4.47  | 64  | transcription accessory protein [Shigella phage SP18] (4e-28) {iii}   | 0 | N |
| 250 | 150355-150624 | - | 90   | 10.5  | 5.04  | 60  | dsDNA binding protein [Shigella phage SP18] (6e-23) {iii}             | 0 | N |
| 251 | 150633-151550 | - | 306  | 35.6  | 8.61  | 99  | ribonuclease [Shigella phage Shfl2] (0.0) {ii}                        | 0 | N |
| 252 | 151655-155527 | + | 1291 | 140.4 | 5.19  | 95  | tail fiber protein [Shigella phage Shfl2] (0.0) {i}                   | 0 | N |
| 253 | 155536-156651 | + | 372  | 40.3  | 5.16  | 96  | tail hinge connector [Shigella phage Shfl2] (0.0) {i}                 | 0 | N |



|     |               |   |      |       |       |    |                                                        |   |   |
|-----|---------------|---|------|-------|-------|----|--------------------------------------------------------|---|---|
| 254 | 156714-157370 | + | 219  | 23.4  | 6.07  | 81 | tail fiber protein [Shigella phage Shfl2] (6e-122) {i} | 0 | N |
| 255 | 157379-160687 | + | 1103 | 118.7 | 5.62  | 35 | tail fiber protein [Shigella phage Shfl2] (2e-98) {i}  | 0 | N |
| 256 | 160719-161498 | + | 260  | 26.2  | 8.48  | 41 | tail fiber protein [Shigella phage Shfl2] (5e-16) {i}  | 0 | N |
| 257 | 161529-162185 | + | 219  | 25.2  | 7.70  | 99 | holin [Shigella phage Shfl2] (8e-158) {v}              | 1 | N |
| 258 | 162186-162458 | - | 91   | 10.7  | 5.42  | 53 | anti-sigma factor [Shigella phage SP18] (1e-18) {iii}  | 0 | N |
| 259 | 162471-162623 | - | 51   | 6.0   | 4.92  | 98 | hypothetical protein [Shigella phage Shfl2] (3e-25)    | 0 | N |
| 260 | 162620-162898 | - | 93   | 10.9  | 4.48  | 97 | nuclease [Enterobacteria phage T4] (7e-56) {ii}        | 0 | N |
| 261 | 162888-163007 | - | 40   | 4.7   | 10.20 | 97 | hypothetical protein [Shigella phage Shfl2] (9e-17)    | 0 | N |
| 262 | 162982-163200 | - | 73   | 8.8   | 8.51  | 98 | hypothetical protein [Enterobacteria phage T4] (2e-22) | 0 | N |
| 263 | 163184-163480 | - | 99   | 11.4  | 8.93  | 95 | hypothetical protein [Shigella phage Shfl2] (4e-62)    | 0 | N |
| 264 | 163480-163941 | - | 154  | 18.0  | 5.15  | 99 | hypothetical protein [Shigella phage Shfl2] (3e-109)   | 0 | N |
| 265 | 163938-164267 | - | 110  | 12.8  | 9.24  | 98 | hypothetical protein [Shigella phage Shfl2] (6e-43)    | 0 | N |
| 266 | 164278-164913 | - | 212  | 23.7  | 7.78  | 76 | hypothetical protein [Shigella phage SP18] (2e-56)     | 0 | N |

<sup>a</sup> i, phage structure and packaging; ii, DNA replication and modification; iii, signal transduction and regulation; iv, nucleotide metabolism; v, host lysis.
